# Supplementary material for: Butterbur Leaves Attenuate Memory Impairment and Neuronal Cell Damage in Amyloid Beta-Induced Alzheimer’s Disease Models
Source: PubMed Central journal article supplement (PMC6032106; doi:10.3390/ijms19061644), 2018-06-01
Supplement: ijms-19-01644-s001.pdf [file ijms-19-01644-s001.pdf]

# Supplementary Materials: Butterbur Leaves Attenuate Memory Impairment and Neuronal Cell Damage in Amyloid Beta-Induced Alzheimer's Disease Models

Namkwon Kim, Jin Gyu Choi, Sangsu Park, Jong Kil Lee and Myung Sook Oh

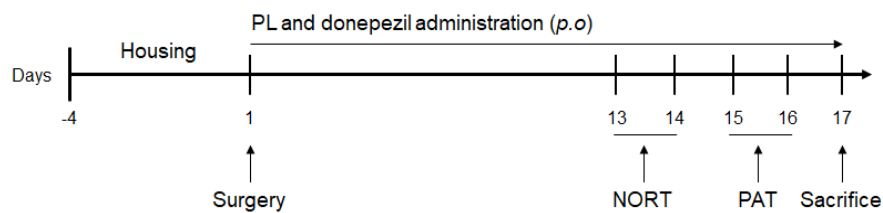

**Figure S1.** Experimental protocol. PL; *Petasites japonicus* leaves, NORT; novel object recognition test, PAT; passive avoidance test.
